# Supplementary material
Source: MDPI journal article supplement (https://www.mdpi.com/2504-3900/79/1/8)

# Phytochemical and pharmacological study of *Plectranthus ecklonii* Benth.

Eva María Domínguez-Martín<sup>1,2\*</sup>, Ana Margarida Antão<sup>1,3\*</sup>, Epole Ntungwe<sup>1,2</sup>, Raquel Coimbra<sup>1</sup>, Vera Isca<sup>1,3</sup>, Ana María Díaz-Lanza<sup>2</sup>, Patrícia Rijo<sup>1,3</sup>

<sup>1</sup>CBIOS - Universidade Lusófona Research Center for Biosciences & Health Technologies, Campo Grande 376, 1749-024 Lisboa, Portugal.

<sup>2</sup>Department of Biomedical Sciences, Faculty of Pharmacy, University of Alcalá de Henares, Ctra. A2, Km 33.100 – Campus Universitario, 28805. Alcalá de Henares, Madrid, Spain.

<sup>3</sup>Instituto de Investigação do Medicamento (iMed.Ulisboa), Faculdade de Farmácia, Universidade de Lisboa, 1649-003 Lisboa, Portugal.

E-mail: [p1609@ulusofona.pt](mailto:p1609@ulusofona.pt)

\*authors contributed equally to this work

**1. Introduction:** All over the world, plants have been used to prevent and treat a variety of diseases, as it has been compiled in traditional medicine books. Therefore, they continue to be important sources of drugs nowadays. *Plectranthus* species (*Lamiaceae* family) have a widespread ethnobotanical use and are often cited by its medicinal properties and applications, particularly in folk medicine. This can be justified by their reported richness in valuable biologically active compounds such as phenolic compounds and diterpenes, specifically, different types of royleanones.

**2. Objectives:** This work enumerated the metabolites isolated to date from *Plectranthus ecklonii* Benth., extracts and their biological activities. The HPLC analysis presented is part of an ongoing project at CBIOS of identification, quantification and evaluation of the bioactive components (in particular, diterpenes and hydrocinnamic acids) in different species of *Plectranthus*.

**3. Materials and Methods:** Bibliographical review using the information compiled from books and electronic databases (Web of Science, PubMed, among others) and experimental work [1-3]:

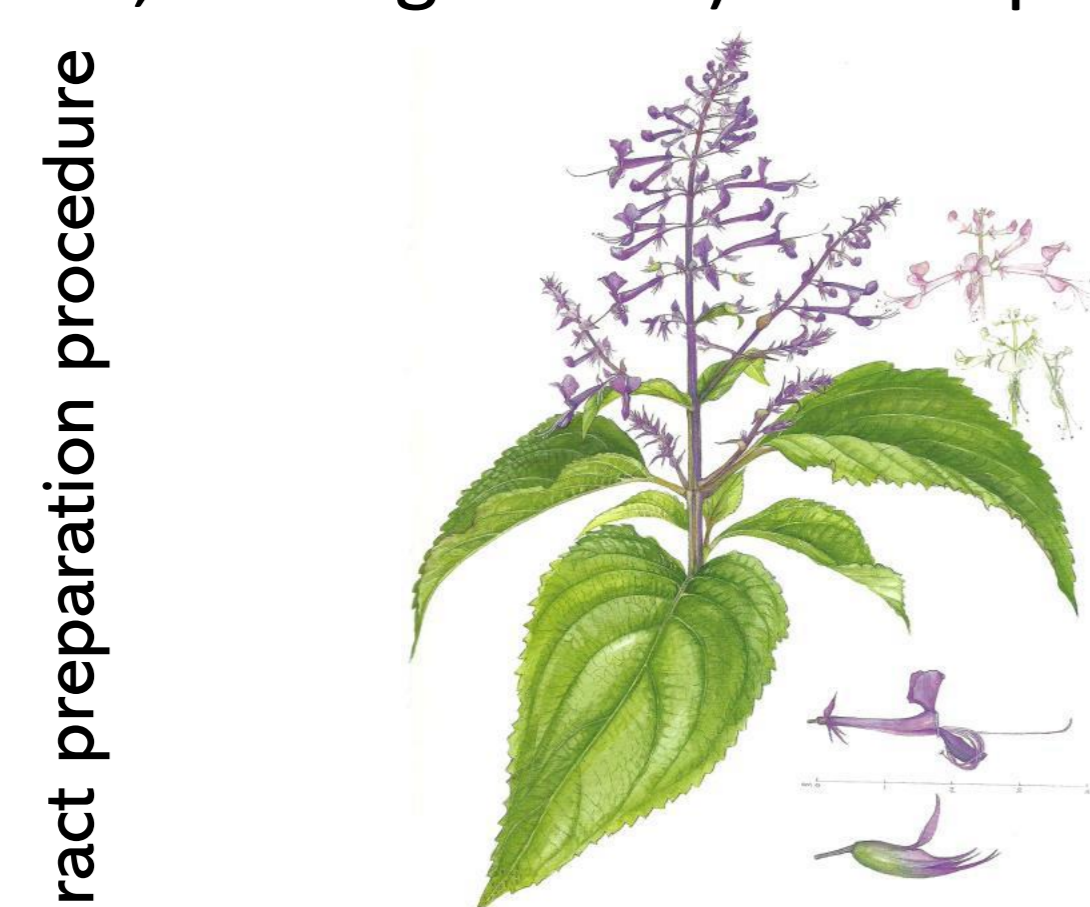

Fig. 1 - *Plectranthus ecklonii*

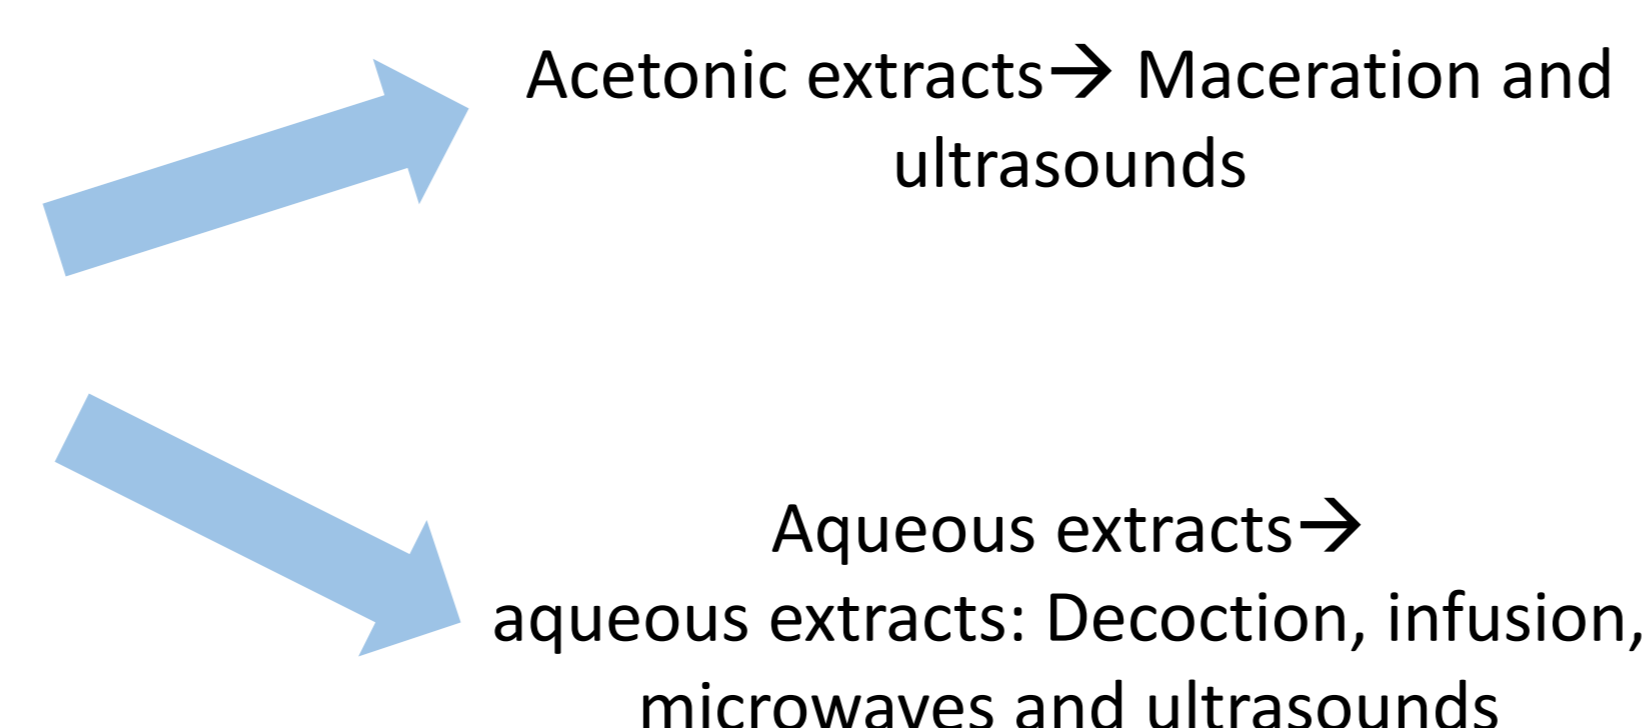

2. Quantification by HPLC-DAD Analysis

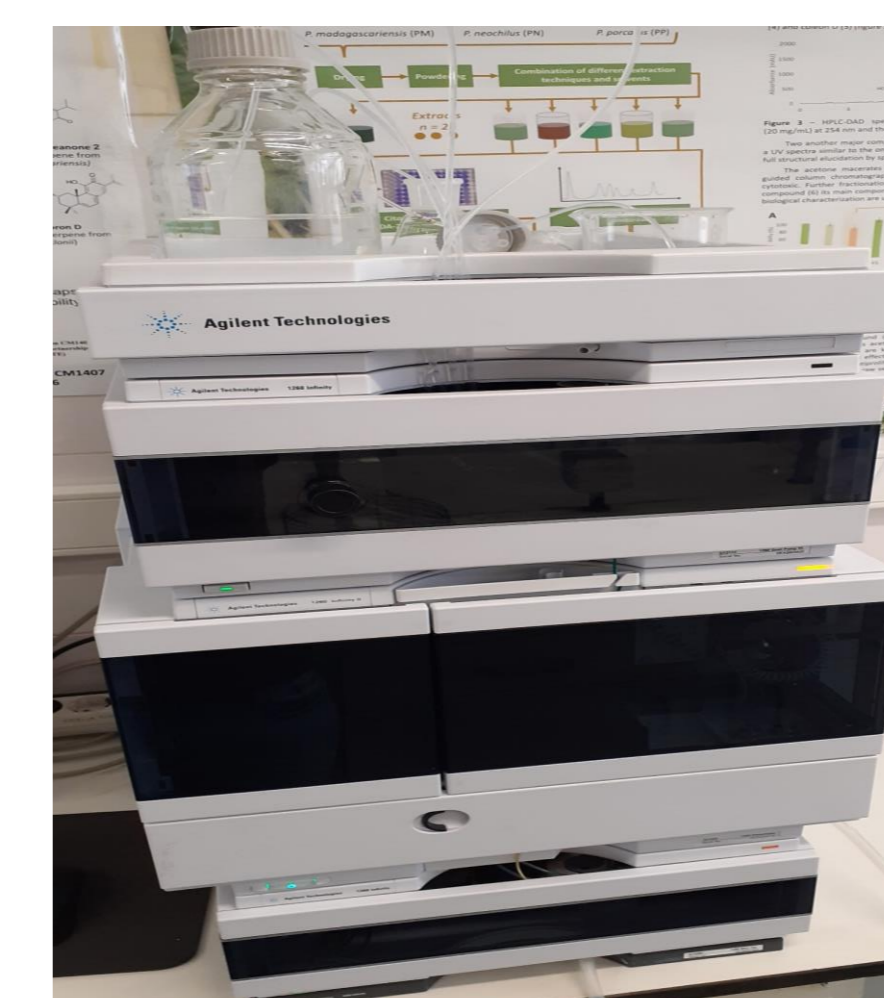

Fig. 2 – HPLC-DAD

## 4. Results and discusión:

1. **Diterpene:** Parvifloron D quantification (430 nm) in *P. ecklonii* extracts (1 mg/mL)

| Solvent / Extraction method  | Parvifloron D (µg/mg) |
|------------------------------|-----------------------|
| Acetone / Maceration         | 136,75                |
| Acetone / Ultrasounds        | 166,10                |
| Acetone / Supercritic fluids | 2,22                  |
| Water / Decoction            | 2,44                  |
| Water / Infusion             | 1,02                  |
| Water / Microwaves           | 1,18                  |
| Water / Ultrasounds          | 1,15                  |

2. **Phenolic compounds:** Caffeic (Caf), rosmarinic (RA) and chlorogenic acid (Clor) quantification (290 nm) in *P. ecklonii* extracts (1 mg/mL)

| Solvent / Extraction method  | Caf (µM) | RA (µM) | Clor (µM) |
|------------------------------|----------|---------|-----------|
| Acetone / Maceration         | 3,89     | 43,86   | 9         |
| Acetone / Ultrasounds        | 5,27     | 14,33   | 5,54      |
| Acetone / Supercritic fluids | 0,78     | 0       | 0         |
| Water / Decoction            | 36,03    | 224,28  | 18,81     |
| Water / Infusion             | 15,83    | 112,73  | 11,89     |
| Water / Microwaves           | 20,8     | 183,86  | 15,66     |
| Water / Ultrasounds          | 15,34    | 88,18   | 10,39     |

## 5. Discussion & conclusions:

Twenty-eight compounds had been isolated from the plant with different activities (antimicrobial, antitumor, antioxidant and anti-inflammatory)

The results did not show marked differences between each extraction method (Table 1 and 2), but between the solvents used (acetone and water)

In the extraction of hydrocinnamic acids, the results clearly show that higher levels of compounds were obtained with the most polar solvent, that is, water. Of the applied techniques, the decoction was the one that allowed to detect greater amounts of compounds, which is in accordance with what is described in the literature [4]

The highest value of parvifloron D (1) was obtained in the acetonic extract prepared by ultrasound (Table 1).

Rosmarinic acid (RA) is undoubtedly the predominant compound in the aqueous extracts of *P. ecklonii*

## 6. Acknowledgments:

This research was funded by Fundação para a Ciência e a Tecnologia (FCT, Portugal), through projects UIDP/04567/2020 and UIDB/04567/2020. E.M.D-M gratefully acknowledges being the recipient of a predoctoral FPU 2019 fellowship from the University of Alcalá de Henares.

## 7. References:

[1] Rijo, P., Gaspar-Marques, C., Simões, M.F., Jimeno, M.L., & Rodríguez, B. (2007). Further diterpenoids from *Plectranthus ornatus* and *P. grandidentatus*. *Biochemical Systematics and Ecology*, 35, 215-221. [2] Kubínová, R., Švajdlenka, E., Schneiderová, K., Hanáková, Z., Dall'Acqua, S., & Farsa, O. (2013). Polyphenols and diterpenoids from *Plectranthus forsteri* "Marginatus." *Biochemical Systematics and Ecology*, 49, 39-42. doi:10.1016/j.bse.2013.03.029 [3] Rijo, P., Falé, P.L., Serralheiro, M.L., Simões, M.F., Gomes, A., & Reis, C. (2014). Optimization of medicinal plant extraction methods and their encapsulation through extrusion technology. *Measurement*, 58, 249-255. [4] Gomes, A., Jerónimo, A., Reis, C., & Rijo, P. (2012). New treatment strategies with plant extracts teas for Alzheimer's disease. *Biomed Biopharm Res.*, (9) 2:242.

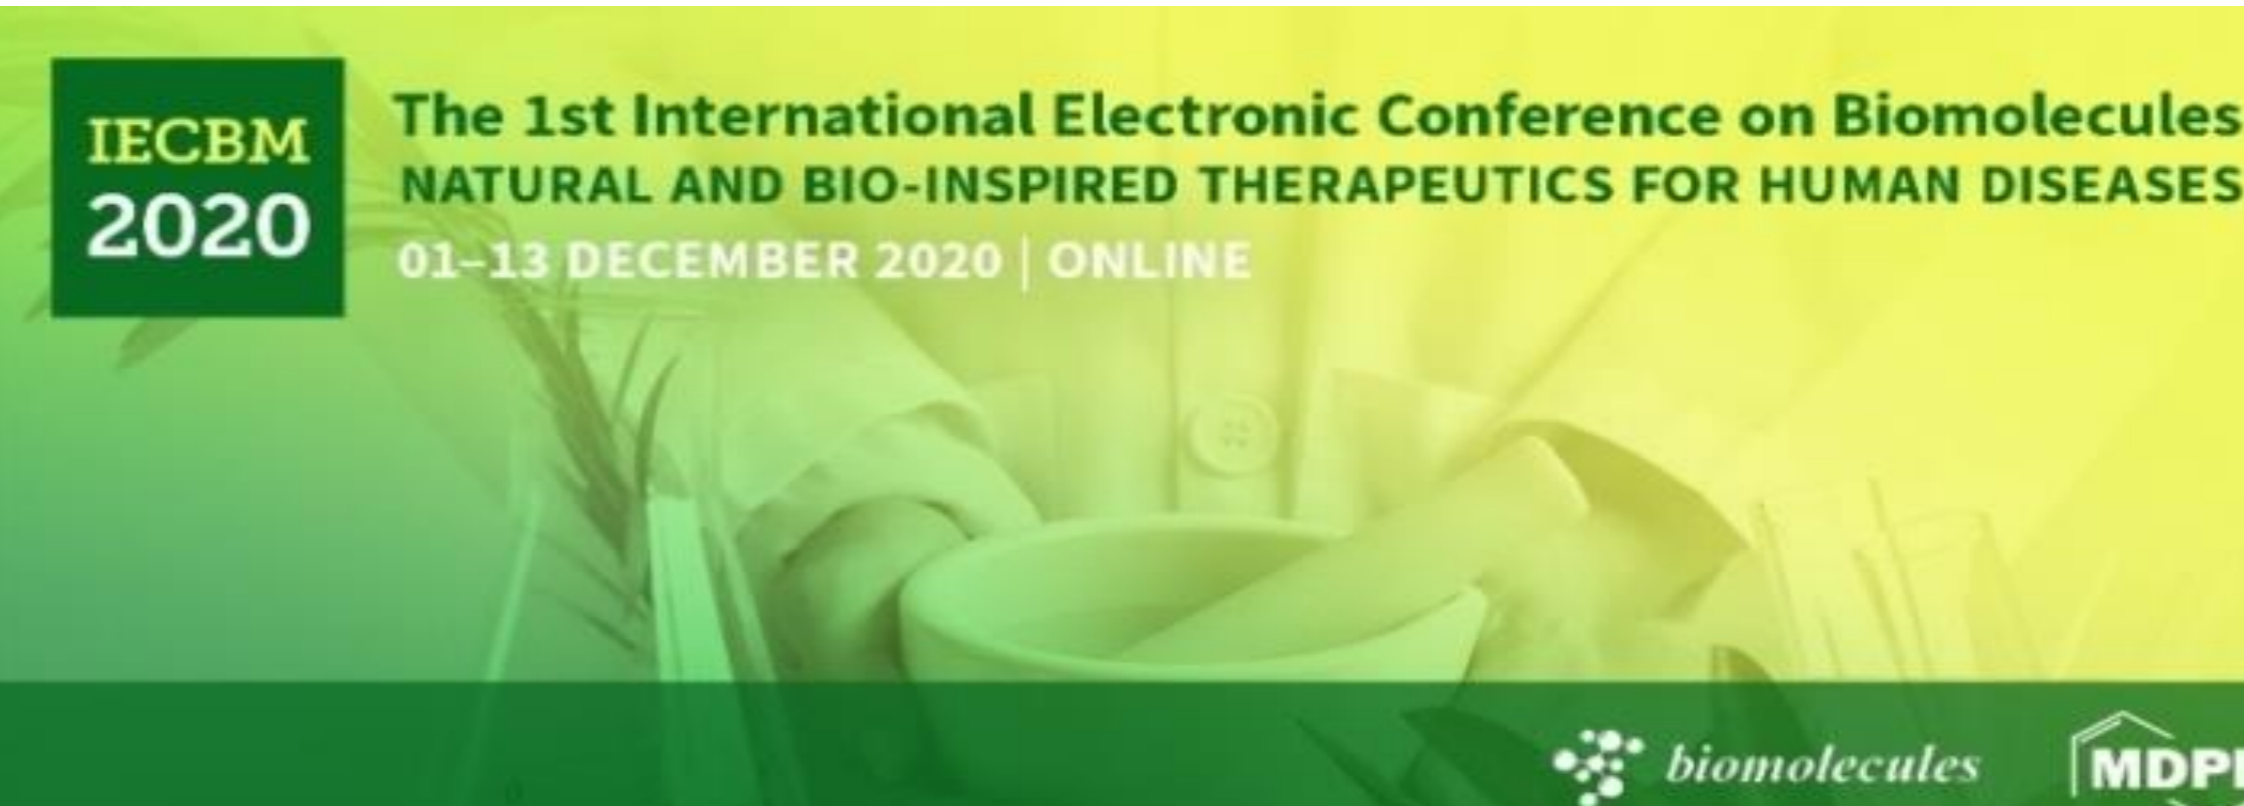

Supplement: s1 [file s1]
